# Supplementary material
Source: PubMed Central journal article supplement (PMC4702263)
Supplement: NIHMS727007-supplement-eFigure.pdf [file NIHMS727007-supplement-eFigure.pdf]

## Supplementary Online Content

Rosen MJ, Dhawan A, Saeed SA. Inflammatory bowel disease in children and adolescents. *JAMA Pediatr*. Published online September 28, 2015.  
doi:10.1001/jamapediatrics.2015.1982.

**eFigure.** Growth Chart of a Boy With Crohn Disease and Growth Failure

This supplementary material has been provided by the authors to give readers additional information about their work.

**eFigure. Growth Chart of a Boy With Crohn Disease and Growth Failure**

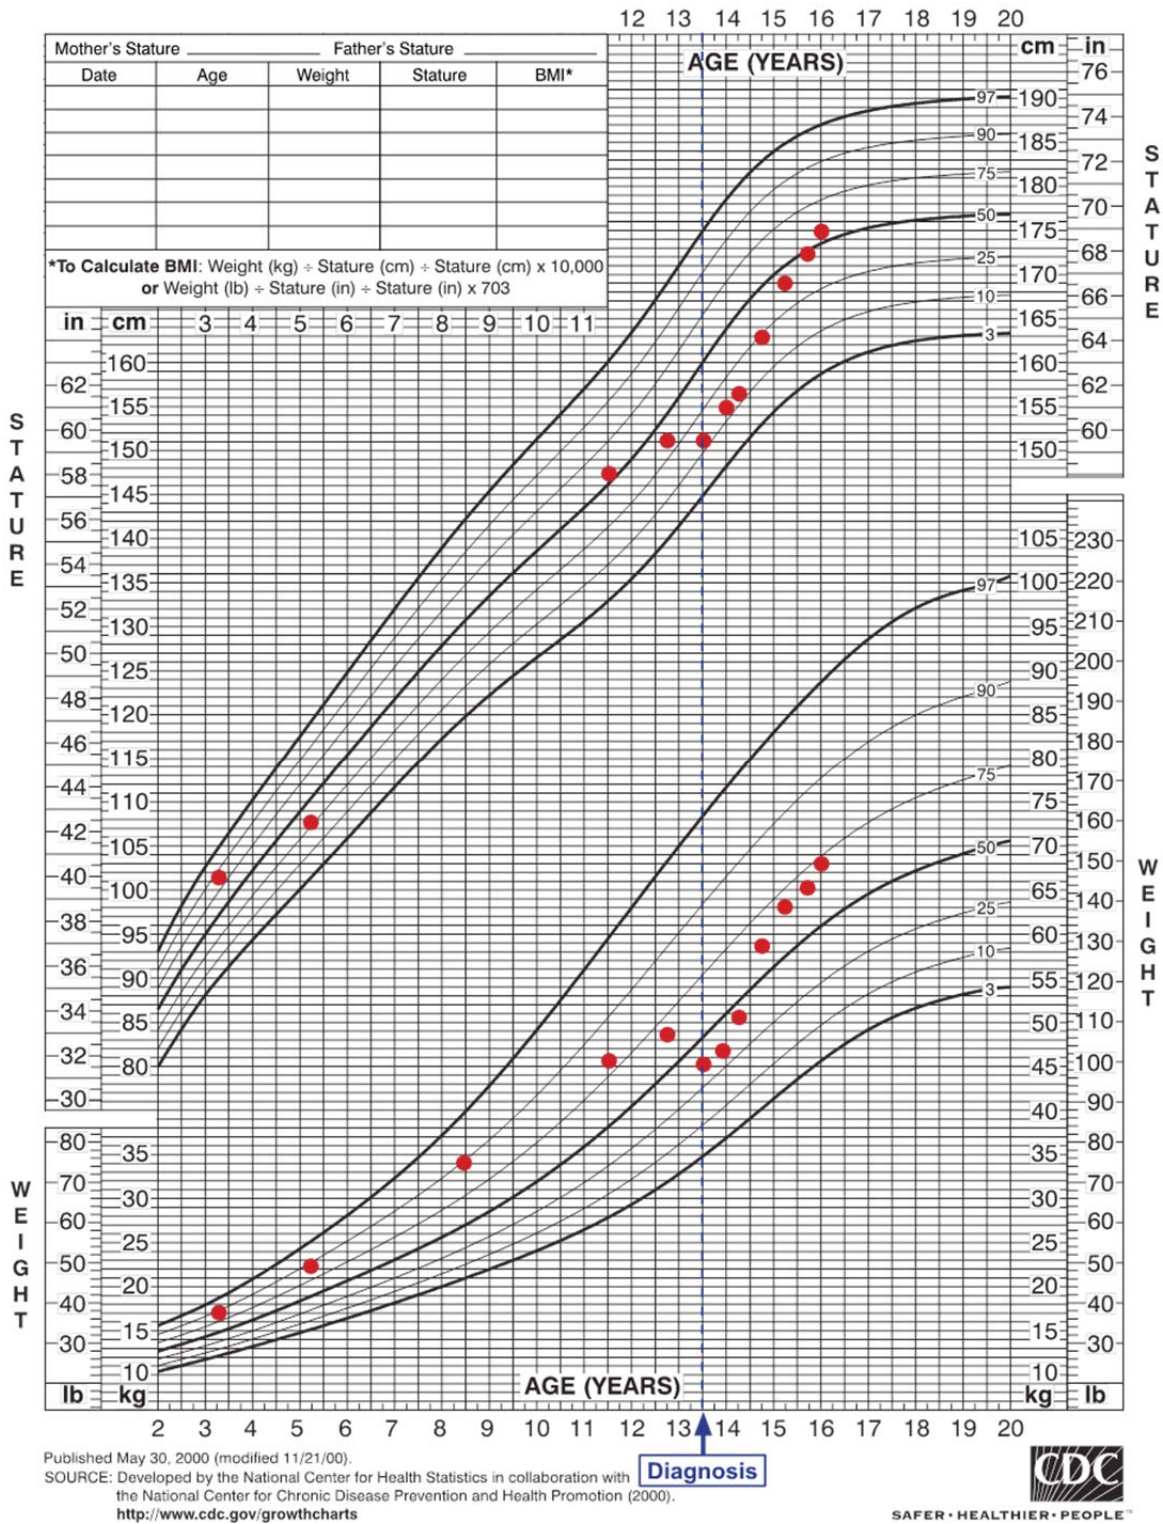

The patient was diagnosed at 13 years of age after presenting with painful bowel movements with blood associated with an anal skin tag and fissures. The growth chart demonstrates flattening of both the weight and stature curves during the 2 years prior to diagnosis. The patient was initially treated with 6-MP, and then switched to infliximab 6 months after diagnosis with subsequent normalization of weight gain and linear growth.
